# Supplementary material for: Two-Week Protocol Biopsy in Renal Allograft: Feasibility, Safety, and Outcomes
Source: MDPI journal article supplement (doi:10.3390/jcm11030785), 2022-01-31
Supplement: s1 [file s1]

Supplementary Table S1. Comparison of detection and treatment rates of subclinical rejection between two-week and one-year protocol biopsies

| Variables         | Two-week protocol<br>Biopsy ( <i>n</i> = 842) | One-year protocol<br>biopsy ( <i>n</i> = 399) | P value |
|-------------------|-----------------------------------------------|-----------------------------------------------|---------|
| Detection         |                                               |                                               | < 0.001 |
| None              | 712 (84.6 %)                                  | 265 (66.4 %)                                  |         |
| SCR               | 130 (15.4 %)                                  | 134 (33.6 %)                                  |         |
| Borderline change | 85 (10.1 %)                                   | 91 (22.8 %)                                   |         |
| TCMR              | 28 (3.3 %)                                    | 30 (7.5 %)                                    |         |
| AMR               | 13 (1.5 %)                                    | 9 (2.3 %)                                     |         |
| Combined          | 4 (0.5 %)                                     | 4 (1.0 %)                                     |         |
| Treatment rates   |                                               |                                               | 0.147   |
| Total             | 117 / 130 (90.0 %)                            | 112 / 134 (83.6 %)                            |         |
| Borderline change | 75 / 85 (88.2 %)                              | 77 / 91 (84.6 %)                              |         |
| TCMR              | 28 / 28 (100 %),                              | 23 / 30 (76.7 %)                              |         |
| AMR               | 10 / 13 (76.9 %)                              | 8 / 9 (88.9 %)                                |         |
| Combined          | 4 / 4 (100 %)                                 | 4 / 4 (100 %)                                 |         |

Data are presented as *n* (%).

SCR, subclinical rejection; TCMR, T-cell mediated rejection; AMR, antibody-mediated rejection.
